# Supplementary material for: Alzheimer’s Disease, and Breast and Prostate Cancer Research: Translational Failures and the Importance to Monitor Outputs and Impact of Funded Research
Source: MDPI journal article supplement (doi:10.3390/ani10071194), 2020-07-14
Supplement: s1 [file s1]

**Table S1. Currently available mouse models of Alzheimer's disease** (retrieved from: <https://www.alzforum.org/research-models/alzheimers-disease>).

| Name                                             | Modifications                                        | Neuropathology                                                                                                                                                                                                                                                                                                                                                                                    |
|--------------------------------------------------|------------------------------------------------------|---------------------------------------------------------------------------------------------------------------------------------------------------------------------------------------------------------------------------------------------------------------------------------------------------------------------------------------------------------------------------------------------------|
| <a href="#">3xTg</a>                             | APP: Transgenic; PSEN1: Transgenic; MAPT: Transgenic | Age-related, progressive neuropathology including plaques and tangles. Extracellular A $\beta$ deposits by 6 months in frontal cortex, more extensive by 12 months. No tau pathology at 6 months, but evident at 12 months. Synaptic dysfunction, including LTP deficits, prior to plaques and tangles.                                                                                           |
| <a href="#">5xFAD (B6SJL)</a>                    | APP: Transgenic; PSEN1: Transgenic                   | Amyloid pathology starting at 2 months, including amyloid plaques. Accumulation of intraneuronal A $\beta$ before amyloid deposition. Gliosis and synapse degeneration. Neuron loss in cortical layer 5 and subiculum. No neurofibrillary tangles.                                                                                                                                                |
| <a href="#">5xFAD (C57BL6)</a>                   | APP: Transgenic; PSEN1: Transgenic                   | Amyloid pathology starting at 2 months, including amyloid plaques. Accumulation of intraneuronal A $\beta$ before amyloid deposition. Gliosis and synapse degeneration. Neuron loss in cortical layer V.                                                                                                                                                                                          |
| <a href="#">A7 APP transgenic</a>                | APP: Transgenic                                      | Progressive amyloid deposition in the cerebral cortex by approximately 9-12 months.                                                                                                                                                                                                                                                                                                               |
| <a href="#">Abca7*A1527G/APOE4/Trem2*R47H</a>    | Abca7: Knock-In; APOE: Knock-In; Trem2: Knock-In     | Unknown.                                                                                                                                                                                                                                                                                                                                                                                          |
| <a href="#">Abca7 KO/APOE4/Trem2*R47H</a>        | Abca7: Knock-Out; APOE: Knock-In; Trem2: Knock-In    | Unknown.                                                                                                                                                                                                                                                                                                                                                                                          |
| <a href="#">ADanPP</a>                           | ITM2B (BRI2): Transgenic                             | ADan deposition starts in the hippocampus and meningeal vessels at 2 months and increases with age. By 18 months, deposition is widespread. The majority of amyloid deposits are associated with the vasculature, where they destroy the integrity of the vessel wall and lead to microhemorrhages. Parenchymal amyloid plaques surrounded by microglia and dystrophic neurites are also present. |
| <a href="#">AD-BXD</a>                           | APP: Transgenic; PSEN1: Transgenic                   | Transgenic AD-BXD mice develop amyloid plaques by 6 months of age, although the extent of plaque deposition is strain-dependent.                                                                                                                                                                                                                                                                  |
| <a href="#">APLP2 Knock-out</a>                  | Aplp2: Knock-Out                                     | Not observed.                                                                                                                                                                                                                                                                                                                                                                                     |
| <a href="#">APOE2 Knock-In</a>                   | APOE: Knock-In                                       | Unknown.                                                                                                                                                                                                                                                                                                                                                                                          |
| <a href="#">APOE2 Knock-In, floxed (CureAlz)</a> | APOE: Knock-In                                       | Unknown.                                                                                                                                                                                                                                                                                                                                                                                          |
| <a href="#">APOE2 Knock-In (JAX)</a>             | APOE: Knock-In                                       | Unknown.                                                                                                                                                                                                                                                                                                                                                                                          |
| <a href="#">APOE2 Targeted Replacement</a>       | APOE: Knock-In                                       | Unknown.                                                                                                                                                                                                                                                                                                                                                                                          |
| <a href="#">APOE3 Knock-In, floxed (CureAlz)</a> | APOE: Knock-In                                       | Unknown.                                                                                                                                                                                                                                                                                                                                                                                          |
| <a href="#">APOE3 Knock-In (JAX)</a>             | APOE: Knock-In                                       | No data.                                                                                                                                                                                                                                                                                                                                                                                          |
| <a href="#">APOE3 Knock-In (Lamb)</a>            | APOE: Knock-In                                       | Unknown.                                                                                                                                                                                                                                                                                                                                                                                          |
| <a href="#">APOE3 Targeted Replacement</a>       | APOE: Knock-In                                       | Unknown.                                                                                                                                                                                                                                                                                                                                                                                          |
| <a href="#">APOE4 Knock-In, floxed (CureAlz)</a> | APOE: Knock-In                                       | Unknown.                                                                                                                                                                                                                                                                                                                                                                                          |
| <a href="#">APOE4 Knock-In (JAX)</a>             | APOE: Knock-In                                       | No data.                                                                                                                                                                                                                                                                                                                                                                                          |
| <a href="#">APOE4 Knock-In (Lamb)</a>            | APOE: Knock-In                                       | Unknown.                                                                                                                                                                                                                                                                                                                                                                                          |
| <a href="#">APOE4 Targeted Replacement</a>       | APOE: Knock-In                                       | Unknown.                                                                                                                                                                                                                                                                                                                                                                                          |
| <a href="#">APOE Knock-out</a>                   | APOE: Knock-Out                                      | Unknown.                                                                                                                                                                                                                                                                                                                                                                                          |

|                                                    |                                                 |                                                                                                                                                                                                                                                                                                                                                                                            |
|----------------------------------------------------|-------------------------------------------------|--------------------------------------------------------------------------------------------------------------------------------------------------------------------------------------------------------------------------------------------------------------------------------------------------------------------------------------------------------------------------------------------|
| <a href="#">APP23</a>                              | APP: Transgenic                                 | A $\beta$ deposits first observed at 6 months. Congophilic plaques increase in size and number with age and are surrounded by activated microglia, astrocytes, and dystrophic neurites containing hyperphosphorylated tau (although no neurofibrillary tangles). Neuronal loss in the CA1 region of the hippocampus. Mice also develop CAA, and microhemorrhages occur at later ages.      |
| <a href="#">APP23 x PS1-R27H</a>                   | APP: Transgenic; PSEN1: Knock-In                | Amyloid deposition by 6 months of age in the cortex and hippocampus. Abundant reactive astrocytes in the vicinity of plaques. Elevated A $\beta$ 43 in the brain by 3 months. High density of cored plaques. Pyroglutamate A $\beta$ (N3pE-A $\beta$ ) associated with amyloid plaques.                                                                                                    |
| <a href="#">APP751SL/PS1 KI</a>                    | APP: Transgenic; PSEN1: Knock-In                | Acceleration of extracellular A $\beta$ deposition compared to the single transgenics. Age-dependent neuronal loss in the hippocampus with extensive neuronal loss in the CA1/2 at 10 months with detection as early as 6 months in female mice. Intraneuronal A $\beta$ and thioflavin-S-positive deposits before neuronal loss. Astroglia in proximity of A $\beta$ -positive neurons.   |
| <a href="#">APP-C99 (tg13592)</a>                  | APP: Transgenic                                 | No neuropathology up to age 29 months; however, pathology reminiscent of inclusion body myopathy observed at 6-12 months: A $\beta$ -immunoreactive deposits in skeletal muscle fibers. Muscle fibers with A $\beta$ -immunoreactive deposits increased with age and also became vacuolated.                                                                                               |
| <a href="#">APPDutch</a>                           | APP: Transgenic                                 | Increased A $\beta$ 40/42 ratio. Extensive vascular A $\beta$ deposition starting at 22-24 months appearing first in leptomeningeal vessels followed by cortical vessels, leading to smooth muscle cell degeneration, hemorrhages, and neuroinflammation. Parenchymal amyloid plaques are not observed.                                                                                    |
| <a href="#">APP E693A-Tg (Osaka)</a>               | APP: Transgenic                                 | Age-dependent accumulation of A $\beta$ oligomers within hippocampal and cortical neurons, but negligible deposits of extracellular amyloid. Abnormal tau phosphorylation, but no overt tangle pathology. Synaptic loss and gliosis in hippocampus and cerebral cortex. Late neuronal loss in the CA3 region of the hippocampus.                                                           |
| <a href="#">APP Knock-in</a>                       | APP: Knock-In                                   | Unknown.                                                                                                                                                                                                                                                                                                                                                                                   |
| <a href="#">APP Knock-out</a>                      | APP: Knock-Out                                  | Elevated reactive gliosis by 14 weeks in the hippocampus and parts of the neocortex.                                                                                                                                                                                                                                                                                                       |
| <a href="#">App KO/APOE4/Trem2*<sup>R47H</sup></a> | APOE: Knock-In; App: Knock-Out; Trem2: Knock-In | Unknown.                                                                                                                                                                                                                                                                                                                                                                                   |
| <a href="#">APP NL-F Knock-in</a>                  | APP: Knock-In                                   | Elevated A $\beta$ peptides accumulating into plaques starting at 6 months. Microgliosis and astrogliosis, especially around plaques. Reduced synaptophysin and PSD-95 indicative of synaptic loss. No tangle pathology or neurodegeneration.                                                                                                                                              |
| <a href="#">APP NL-G-F Knock-in</a>                | APP: Knock-In                                   | Aggressive amyloidosis with deposition in the cortex beginning at 2 months and approaching saturation by 7 months. A $\beta$ deposition in heterozygous mice at 4 months. Subcortical amyloidosis. Exacerbated microgliosis and astrogliosis compared to APP <sup>NL-F</sup> mice. Reduced synaptophysin and PSD-95 indicative of synaptic loss. No tangle pathology or neurodegeneration. |
| <a href="#">AppNL-G-F/MAPT double knock-in</a>     | App: Knock-In; MAPT: Knock-In                   | Amyloid plaques, plaque-associated neuritic dystrophy, and neuroinflammation, similar to App <sup>NL-G-F</sup> .                                                                                                                                                                                                                                                                           |
| <a href="#">APPPS1</a>                             | APP: Transgenic; PSEN1: Transgenic              | Amyloid plaque deposition starts at approximately 6 weeks in the neocortex. Amyloid deposits in the hippocampus appear at 3-4 months, and in the striatum, thalamus and brainstem at 4-5 months. Phosphorylated tau-positive neuritic processes have been observed in the vicinity of all congophilic amyloid deposits, but no fibrillar tau inclusions are seen.                          |

|                                              |                                                      |                                                                                                                                                                                                                                                                                                                                            |
|----------------------------------------------|------------------------------------------------------|--------------------------------------------------------------------------------------------------------------------------------------------------------------------------------------------------------------------------------------------------------------------------------------------------------------------------------------------|
| <a href="#">APP/PS1/rTg21221</a>             | APP: Transgenic; PSEN1: Transgenic; MAPT: Transgenic | Tau accumulations, dystrophic neurites, astrogliosis, neuronal loss, and synapse loss were more pronounced adjacent to cortical plaques. Tangles were not observed.                                                                                                                                                                        |
| <a href="#">APPsw/0; Pdgfrβ+/-</a>           | APP: Transgenic; PDGFRB: Knock-Out                   | Amyloid plaques; elevated brain interstitial human and murine Aβ due to reduced clearance of soluble Aβ, cerebral amyloid angiopathy, tau hyperphosphorylation and related pathology. Neurite loss and neuronal loss in the cortex and hippocampus.                                                                                        |
| <a href="#">APPSwDI x NOS2 Knock-out</a>     | APP: Transgenic; NOS2: Knock-Out                     | Plaques especially in the thalamus and subiculum. Aggregated, hyperphosphorylated tau tangles. Neuronal loss especially of NPY neurons in the hippocampus and subiculum. More severe pathology than Tg-SwDI alone.                                                                                                                         |
| <a href="#">APPSwe</a>                       | APP: Transgenic                                      | Amyloid plaques by 17-18 months in the neocortex and hippocampus with detection of 5-10 fold more Aβ40 than Aβ42. Plaque burden significantly lower than in the double transgenic PS2APP. Lower levels of insoluble Aβ40 and Aβ42 than the PS2APP mouse at 16-18 months.                                                                   |
| <a href="#">APP(Swedish) (R1.40)</a>         | APP: Transgenic                                      | By 14-16 months, homozygotes have diffuse and compact Aβ deposits in the frontal cortex, by 18-20 months plaques throughout the cortex and olfactory bulb with occasional deposits in the corpus callosum and hippocampus. No tangles, but some changes in phosphorylated tau. Reactive astrocytes and microglia by 14-16 months.          |
| <a href="#">APPSwe (line C3-3)</a>           | APP: Transgenic                                      | Age-associated increase in Aβ40 and Aβ42 and some amyloid deposition at advanced age.                                                                                                                                                                                                                                                      |
| <a href="#">APPSwe (line E1-2)</a>           | APP: Transgenic                                      | Age-dependent increase in Aβ42, with low levels at 6-14 months and high levels at 24-26 months.                                                                                                                                                                                                                                            |
| <a href="#">APPSweLon</a>                    | APP: Transgenic                                      | No amyloid plaques observed at 2 years.                                                                                                                                                                                                                                                                                                    |
| <a href="#">APPSwe/PSEN1(A246E)</a>          | APP: Transgenic; PSEN1: Transgenic                   | Amyloid plaques by 9 months, starting in the hippocampus and subiculum. Plaques later develop in the cortex; the striatum and thalamus are relatively spared. Amyloid pathology is more severe in females. Dystrophic neurites and gliosis in the cortex and hippocampus.                                                                  |
| <a href="#">APPSwe/PSEN1dE9 (C3-3 x S-9)</a> | APP: Transgenic; PSEN1: Transgenic                   | Elevated Aβ42 and plaques in the hippocampus and cortex. No tangles. Reduced cholinergic markers.                                                                                                                                                                                                                                          |
| <a href="#">APPswe/PSEN1dE9 (C57BL6)</a>     | APP: Transgenic; PSEN1: Transgenic                   | Amyloid plaques begin to emerge in the cortex at about 4 months of age and in the hippocampus at about 6 months. Gliosis and dystrophic neurites are associated with plaques. Amyloid angiopathy has been observed in the retina.                                                                                                          |
| <a href="#">APPswe/PSEN1dE9 (line 85)</a>    | APP: Transgenic; PSEN1: Transgenic                   | Occasional Aβ deposits by 6 months with abundant plaques in the hippocampus and cortex by 9 months and a progressive increase in plaques up to 12 months. No tangles. Decrease in synaptic markers and increase in complement immunoreactivity.                                                                                            |
| <a href="#">APPSw-NSE</a>                    | APP: Transgenic                                      | Increased Aβ42 in the cortex and hippocampus of 12 month old mice, but no plaques. Increased tau phosphorylation and TUNEL-stained nuclei relative to control mice.                                                                                                                                                                        |
| <a href="#">APP(V642I)KI</a>                 | APP: Transgenic                                      | Increased Aβ42(43) relative to Aβ40 at 29 months, but without neuritic plaques, neurofibrillary tangles, massive neuronal loss, or brain atrophy.                                                                                                                                                                                          |
| <a href="#">APP(V717I)</a>                   | APP: Transgenic                                      | Plaques start in the subiculum, spreading to the frontal cortex as dense and diffuse aggregates. Prominent amyloid deposits in brain vessels after 15 months. Microbleeds. Amyloid-associated inflammation. CSF Aβ42/Aβ40 ratio decreases from 15 months. Dystrophic neurites containing hyperphosphorylated tau, but no tangle pathology. |

|                                                                            |                                                                  |                                                                                                                                                                                                                                                                                                                                                                                         |
|----------------------------------------------------------------------------|------------------------------------------------------------------|-----------------------------------------------------------------------------------------------------------------------------------------------------------------------------------------------------------------------------------------------------------------------------------------------------------------------------------------------------------------------------------------|
| <a href="#">APP(V717I) x PS1(A246E)</a>                                    | APP: Multi-transgene;<br>PSEN1: Transgenic                       | Soluble, oligomeric A $\beta$ at 2 months and increases with age. Amyloid plaques at 6-9 months, earlier than APP(V717I) single transgenics. Plaques start in the subiculum and spread to the frontal cortex. Amyloid-associated inflammation. CAA pathology at 8 months; microbleeds at 12-15 months. Dystrophic neurites containing hyperphosphorylated tau, but no tangle pathology. |
| <a href="#">Arc48 (APPSw/Ind/Arc)</a>                                      | APP: Transgenic                                                  | Parenchymal neuritic plaques by 2 months accompanied by dystrophic neurites. Prominent hippocampal A $\beta$ deposition by 3-4 months. Relatively low A $\beta$ 42/A $\beta$ 40 ratio. Comparable cerebrovascular amyloid deposition to J20.                                                                                                                                            |
| <a href="#">ArcA<math>\beta</math></a>                                     | APP: Transgenic                                                  | At 6 months intracellular punctate deposits of A $\beta$ abundant in cortex and hippocampus, but overt $\beta$ -amyloid plaques not apparent until 9-15 months. Severe CAA also present at this age with dense A $\beta$ aggregates in blood vessels walls and spreading into the parenchyma.                                                                                           |
| <a href="#">ARTE10</a>                                                     | APP: Transgenic; PSEN1: Transgenic                               | Robust early plaque development (by 3 months in homozygotes, 5 months in hemizygotes), predominantly congophilic dense-core amyloid plaques surrounded by dystrophic neurites and gliosis. Some diffuse plaques and cerebral amyloidosis. No tau tangles. Neurons have reduced dendritic length, surface area, and branches.                                                            |
| <a href="#">BACE1 cKO (Hu, Yan) X 5xFAD</a>                                | Bace1: Conditional Knock-out; APP: Transgenic; PSEN1: Transgenic | Amyloid plaques, reactive astrocytes and microglia, and dystrophic neurites accumulate up to day 120, but to a lesser degree than in control 5xFAD (5xFAD mice homozygous for a floxed Bace1 gene), then recede thereafter.                                                                                                                                                             |
| <a href="#">Bace1 conditional knock-out (adult, whole body) (Vassar)</a>   | Bace1: Conditional Knock-out                                     | Defects in axonal organization.                                                                                                                                                                                                                                                                                                                                                         |
| <a href="#">BACE1 conditional knock-out (Hu, Yan)</a>                      | Bace1: Conditional Knock-out                                     | No gross morphological changes observed.                                                                                                                                                                                                                                                                                                                                                |
| <a href="#">Bace1 conditional knock-out (neonatal, forebrain) (Vassar)</a> | Bace1: Conditional Knock-out                                     | Hypomyelination and defects in axon organization.                                                                                                                                                                                                                                                                                                                                       |
| <a href="#">Bace1 conditional knockout (Tesco)</a>                         | Bace1: Conditional Knock-out                                     | None observed: hippocampal mossy fiber organization and sciatic-nerve myelination were normal.                                                                                                                                                                                                                                                                                          |
| <a href="#">BACE1 Knock-out</a>                                            | BACE1: Knock-Out                                                 | Hypomyelination in the hippocampus and cerebral cortex, but normal axonal development.                                                                                                                                                                                                                                                                                                  |
| <a href="#">BACE2 Knock-out</a>                                            | BACE2: Knock-Out                                                 | Not observed.                                                                                                                                                                                                                                                                                                                                                                           |
| <a href="#">BRI-A<math>\beta</math>40 (BRI2-A<math>\beta</math>40)</a>     | Transgenic                                                       | No overt amyloid pathology or detergent-insoluble amyloid- $\beta$ .                                                                                                                                                                                                                                                                                                                    |
| <a href="#">BRI-A<math>\beta</math>42 (BRI2-A<math>\beta</math>42)</a>     | Transgenic                                                       | Detergent-insoluble amyloid- $\beta$ appearing with age and cored plaques as early as 3 months in the cerebellum. Variable forebrain pathology later with extracellular A $\beta$ plaques in the hippocampus and entorhinal/piriform cortices at 12 months. Age-associated congophilic amyloid angiopathy. No tangles or neuronal loss.                                                 |
| <a href="#">CAST.APP/PS1</a>                                               | APP: Transgenic; PSEN1: Transgenic                               | Amyloid plaques, plaque-associated gliosis, cerebral amyloid angiopathy; possible neuron loss in hippocampal area CA1.                                                                                                                                                                                                                                                                  |
| <a href="#">Ceacam1 KO/APOE4/Trem2*R47H</a>                                | APOE: Knock-In; Ceacam1: Knock-Out; Trem2: Knock-In              | Unknown.                                                                                                                                                                                                                                                                                                                                                                                |

|                                               |                                                                               |                                                                                                                                                                                                                                                                                                                                                           |
|-----------------------------------------------|-------------------------------------------------------------------------------|-----------------------------------------------------------------------------------------------------------------------------------------------------------------------------------------------------------------------------------------------------------------------------------------------------------------------------------------------------------|
| <a href="#">Clasp2*L163P/APOE4/Trem2*R47H</a> | Clasp2: Knock-In; APOE: Knock-In; Trem2: Knock-In                             | Unknown.                                                                                                                                                                                                                                                                                                                                                  |
| <a href="#">CNS-restricted PS1 cKO</a>        | PSEN1: Conditional Knock-out                                                  | Premature differentiation of neural progenitor cells results in reduced cells and neurons. 45 percent of late-born neurons fail to migrate to their appropriate positions in the superficial cortical layers.                                                                                                                                             |
| <a href="#">E2FAD</a>                         | APOE: Knock-In; APP: Transgenic; PSEN1: Transgenic                            | Amyloid plaques starting at 4 months and increasing with age. Gliosis and loss of synaptic proteins.                                                                                                                                                                                                                                                      |
| <a href="#">E3FAD</a>                         | APOE: Knock-In; APP: Transgenic; PSEN1: Transgenic                            | Amyloid plaques starting at 4 months and increasing with age. Gliosis and loss of synaptic proteins.                                                                                                                                                                                                                                                      |
| <a href="#">E4FAD</a>                         | APOE: Knock-In; APP: Transgenic; PSEN1: Transgenic                            | Amyloid plaques starting at 4 months and increasing with age. Gliosis and loss of synaptic proteins.                                                                                                                                                                                                                                                      |
| <a href="#">GFAP-APOE4/APOE Knock-out</a>     | APOE: Transgenic; APOE: Knock-Out                                             | Developing and adult mice express human APOE4 in glia and neuropil.                                                                                                                                                                                                                                                                                       |
| <a href="#">hAbeta-loxP-KI</a>                | APP: Knock-In                                                                 | Unknown.                                                                                                                                                                                                                                                                                                                                                  |
| <a href="#">hAPP/APOE4/Trem2*R47H</a>         | APOE: Knock-In; APP: Knock-In; Trem2: Knock-In                                | Unknown.                                                                                                                                                                                                                                                                                                                                                  |
| <a href="#">hBACE</a>                         | BACE1: Transgenic                                                             | No evidence of A $\beta$ deposition in single transgenic animals.                                                                                                                                                                                                                                                                                         |
| <a href="#">hBACE54</a>                       | BACE1: Transgenic                                                             | Not observed.                                                                                                                                                                                                                                                                                                                                             |
| <a href="#">hCR1 KI on APOE4/Trem2</a>        | Cr2: Knock-Out; CR1: Knock-In; CR2: Knock-In; APOE: Knock-In; Trem2: Knock-In | Unknown.                                                                                                                                                                                                                                                                                                                                                  |
| <a href="#">htau</a>                          | MAPT: Knock-Out; MAPT: Transgenic                                             | Age-associated tau pathology, including redistribution of tau to cell bodies and dendrites, phosphorylated tau, accumulation of aggregated paired helical filaments, and ultimately thioflavin-S positive neurofibrillary tangles. Pathology most severe in neocortex and hippocampus, and minimal in the brain stem and spinal cord. Some neuronal loss. |
| <a href="#">hTau-A152T</a>                    | MAPT: Transgenic                                                              | Tangles or dense tau inclusions not observed. Abnormal accumulations of soluble tau. Age-dependent neuronal loss was observed in the hippocampus.                                                                                                                                                                                                         |
| <a href="#">hTau-AT (hTau40-AT)</a>           | MAPT: Knock-In                                                                | Tangles in hippocampus, cortex, and spinal cord at 3 months with age-dependent increases. Tau hyperphosphorylation, conformation changes, and mislocalization observed. Age-dependent loss of synapses.                                                                                                                                                   |
| <a href="#">hTau.P301S</a>                    | MAPT: Transgenic                                                              | Age-dependent hyperphosphorylation of tau and conformational changes leading to neurofibrillary tanglelike pathology in the cerebral cortex, hippocampus, brain stem, and spinal cord. Neurodegeneration, especially in the spinal cord, accompanied by astrogliosis.                                                                                     |
| <a href="#">Human-BACE1</a>                   | BACE1: Transgenic                                                             | Not observed.                                                                                                                                                                                                                                                                                                                                             |

|                                              |                                                                     |                                                                                                                                                                                                                                                                                                                                                                           |
|----------------------------------------------|---------------------------------------------------------------------|---------------------------------------------------------------------------------------------------------------------------------------------------------------------------------------------------------------------------------------------------------------------------------------------------------------------------------------------------------------------------|
| <a href="#">Il1rap KO/APOE4/Trem2*R47H</a>   | APOE: Knock-In; Il1rap: Knock-Out; Trem2: Knock-In                  | Unknown.                                                                                                                                                                                                                                                                                                                                                                  |
| <a href="#">J20 (PDGF-APPSw,Ind)</a>         | APP: Transgenic                                                     | Age-dependent formation of A $\beta$ plaques. Dystrophic neurites associated with plaques. No tangles. Variable cell loss. Decrease in synaptic markers and increase in complement immunoreactivity.                                                                                                                                                                      |
| <a href="#">JNPL3(P301L)</a>                 | MAPT: Transgenic                                                    | Age and gene-dose dependent development of neurofibrillary tangles as early as 4.5 months in homozygotes and 6.5 months in heterozygotes. Tangles and Pick-body-like inclusions in the amygdala, hypothalamus, pons, medulla, and spinal cord among other areas. Neuronal loss, especially in the spinal cord.                                                            |
| <a href="#">Kif21b*T82T/APOE4/Trem2*R47H</a> | Kif21b: Knock-In; APOE: Knock-In; Trem2: Knock-In                   | Unknown.                                                                                                                                                                                                                                                                                                                                                                  |
| <a href="#">MAPT knock-in</a>                | MAPT: Knock-In                                                      | No evidence of increased neuroinflammation, neuronal death, or brain atrophy in MAPT knock-in mice, compared with wild-type mice.                                                                                                                                                                                                                                         |
| <a href="#">Mthfr*C677T/APOE4/Trem2*R47H</a> | Mthfr: Knock-In; APOE: Knock-In; Trem2: Knock-In                    | Unknown.                                                                                                                                                                                                                                                                                                                                                                  |
| <a href="#">mThy-1 3R Tau (line 13)</a>      | MAPT: Transgenic                                                    | Accumulation of 3R tau in neurons of the cortex and hippocampus. Pick body-like tau aggregates and neuronal loss in the hippocampus and cortex. Astrogliosis, with some 3R tau in GFAP-positive astrocytes. Synapto-dendritic changes and mitochondrial pathology.                                                                                                        |
| <a href="#">mThy1-hAPP751 (TASD41)</a>       | APP: Transgenic                                                     | Age-dependent increases in A $\beta$ 40 and A $\beta$ 42, with A $\beta$ 42 > A $\beta$ 40. Plaques at an early age, starting at 3-6 months in the frontal cortex. At 5-7 months, size and number of plaques increased in the frontal cortex, and dense amyloid deposits appear in hippocampus, thalamus, and olfactory region.                                           |
| <a href="#">NSE-ApoE3</a>                    | APOE: Transgenic                                                    | Human ApoE3 protected against the age-dependent neurodegeneration seen in APOE -/- mice.                                                                                                                                                                                                                                                                                  |
| <a href="#">NSE-ApoE4</a>                    | APOE: Transgenic                                                    | Not observed.                                                                                                                                                                                                                                                                                                                                                             |
| <a href="#">NSE-APP751</a>                   | APP: Transgenic                                                     | Age-dependent increase in A $\beta$ deposits and tau immunoreactivity.                                                                                                                                                                                                                                                                                                    |
| <a href="#">NSE-hPS2(N141I)</a>              | PSEN2: Transgenic                                                   | Not observed.                                                                                                                                                                                                                                                                                                                                                             |
| <a href="#">PDAPP(line109)</a>               | APP: Transgenic                                                     | Amyloid plaques in the hippocampus, cerebral cortex. Gliosis. Dystrophic neurites. Decreased synaptic and dendritic density in the hippocampus.                                                                                                                                                                                                                           |
| <a href="#">PDGF-APPSw,Ind (line J9)</a>     | APP: Transgenic                                                     | Amyloid plaques at 8-10 months, but not at 2-4 months when deficits in synaptic transmission are observed. Approximately 20% of mice had plaques at 5-7 months, 50% at 8-10 months, and 100% by 21-25 months.                                                                                                                                                             |
| <a href="#">PDGF-APP(WT) (line I5)</a>       | APP: Transgenic                                                     | Expression of human APP in the brain especially in the neocortex and hippocampus. No plaques up to 24 months.                                                                                                                                                                                                                                                             |
| <a href="#">PLB1-triple (hAPP/hTau/hPS1)</a> | APP: Multi-transgene; MAPT: Multi-transgene; PSEN1: Multi-transgene | Age-related neuropathology including intraneuronal and oligomeric A $\beta$ accumulation and hyperphosphorylated tau in the hippocampus and cortex from six months. Minimal amyloid plaques up to 21 months. Subtle tau pathology, but no overt tangles. Cortical hypometabolism with increased metabolic activity in basal forebrain and ventral midbrain by FDG-PET/CT. |

|                                                         |                                                  |                                                                                                                                                                                                                                                                                                                                                                                                    |
|---------------------------------------------------------|--------------------------------------------------|----------------------------------------------------------------------------------------------------------------------------------------------------------------------------------------------------------------------------------------------------------------------------------------------------------------------------------------------------------------------------------------------------|
| <a href="#">PLB4 (hBACE1)</a>                           | BACE1: Transgenic                                | Elevated extracellular multimeric A $\beta$ , including A $\beta$ *56 and A $\beta$ hexamers, in the absence of plaques. At 12 months of age, astrogliosis was observed in a region- and genotype-dependent manner, especially in the dentate gyrus, hippocampal CA1, and piriform cortex. No overt tau pathology.                                                                                 |
| <a href="#">Plcg2 KO</a>                                | Plcg2: Knock-Out                                 | Unknown.                                                                                                                                                                                                                                                                                                                                                                                           |
| <a href="#">Plcg2*M28L/APOE4/Trem2*R47H</a>             | APOE: Knock-In; Plcg2: Knock-In; Trem2: Knock-In | Unknown.                                                                                                                                                                                                                                                                                                                                                                                           |
| <a href="#">Prnp-APP</a>                                | APP: Transgenic                                  | Unknown.                                                                                                                                                                                                                                                                                                                                                                                           |
| <a href="#">PS1(A246E)</a>                              | PSEN1: Transgenic                                | Histologically normal up to 2 years old by hematoxylin-eosin, silver, and thioflavin-S staining.                                                                                                                                                                                                                                                                                                   |
| <a href="#">PS1 conditional Knock-out</a>               | PSEN1: Conditional Knock-out                     | Reduction in A $\beta$ 40 and A $\beta$ 42 peptides; accumulation of APP C-terminal fragments.                                                                                                                                                                                                                                                                                                     |
| <a href="#">PS1(M146L)</a>                              | PSEN1: Transgenic                                | No abnormal pathology up to 2.5 years. Elevated A $\beta$ 2(43); no effect on A $\beta$ 40. Altered mitochondrial activity. Disregulation of calcium homeostasis.                                                                                                                                                                                                                                  |
| <a href="#">PS1(M146V)</a>                              | PSEN1: Transgenic                                | No abnormal neuropathology up to 2.5 years. Elevated A $\beta$ 42(43). Altered mitochondrial activity and disregulation of calcium homeostasis.                                                                                                                                                                                                                                                    |
| <a href="#">PS1 P264L</a>                               | PSEN1: Knock-In                                  | Not observed.                                                                                                                                                                                                                                                                                                                                                                                      |
| <a href="#">PS2APP</a>                                  | APP: Transgenic; PSEN2: Transgenic               | Age-associated development of plaques: none at 3 months, overt A $\beta$ deposition in the brain at approximately 6 months, with heavy plaque load in the hippocampus, frontal cortex, and subiculum at 10 months. A $\beta$ deposits in blood vessels were sporadic, mainly in large vessels. Cerebral amyloid deposits correlate with levels of the human APP transcript at 12 months.           |
| <a href="#">PS2APP (PS2(N141I) x APP<sup>swe</sup>)</a> | APP: Transgenic; PSEN2: Transgenic               | Rare amyloid deposits at 5 months, with consistent deposits in the subiculum and frontolateral cortices by 9 months. Plaques increase in number and distribution with time, spreading throughout the neocortex and hippocampus as well as the amygdala and thalamic and pontine nuclei. The distribution and abundance of activated microglia and astrocytes correlate with A $\beta$ deposition.  |
| <a href="#">PS2(N141I)</a>                              | PSEN2: Transgenic                                | Unknown.                                                                                                                                                                                                                                                                                                                                                                                           |
| <a href="#">PS/APP</a>                                  | APP: Transgenic; PSEN1: Transgenic               | A $\beta$ accumulates in the cerebral cortex and hippocampus starting ~6 months and increasing with age. Other regions affected later. Deposition occurs in white matter, cerebrovasculature, and grey matter in the form of diffuse and fibrillar plaques. Fibrillar deposits are associated with dystrophic neurites and GFAP-positive astrocytes at ~6 months with later microglial activation. |
| <a href="#">PS cDKO</a>                                 | PSEN1: Conditional Knock-out; PSEN2: Knock-Out   | At 2 months the number of apoptotic neurons is elevated about 8-fold. By 6 months, about 18 percent of cortical neurons are lost. Up-regulation of inflammatory markers and progressive astrogliosis and microgliosis in the neocortex and hippocampus.                                                                                                                                            |
| <a href="#">PSEN1-flox</a>                              | PSEN1: Knock-Out                                 | No morphological abnormalities. When crossed with Cre recombinase driven by Thy1, brain levels of A $\beta$ 40 and A $\beta$ 42 decrease and C-terminal fragments of APP accumulate.                                                                                                                                                                                                               |
| <a href="#">PSEN1 Knock-out</a>                         | PSEN1: Knock-Out                                 | Impaired neurogenesis. Massive neuronal loss. Hemorrhages in the CNS.                                                                                                                                                                                                                                                                                                                              |
| <a href="#">PSEN1(M146V) Knock-In</a>                   | PSEN1: Knock-In                                  | Hypersensitive to kainate-induced degeneration and death of CA3, CA1 and hilar neurons. Cultured hippocampal neurons have increased vulnerability to death induced by glutamate. Disrupted calcium homeostasis. Increased oxidative stress and mitochondrial dysfunction.                                                                                                                          |
| <a href="#">PSEN1(P117L) (line 13)</a>                  | PSEN1: Transgenic                                | No plaques or diffuse amyloid deposits at 2-3 months. Elevated generation of A $\beta$ 42.                                                                                                                                                                                                                                                                                                         |



|                                                      |                                                  |                                                                                                                                                                                                                                                                                                                                                                   |
|------------------------------------------------------|--------------------------------------------------|-------------------------------------------------------------------------------------------------------------------------------------------------------------------------------------------------------------------------------------------------------------------------------------------------------------------------------------------------------------------|
| <a href="#">PSEN1(WT)</a>                            | PSEN1: Transgenic                                | No pathological changes have been observed in these mice.                                                                                                                                                                                                                                                                                                         |
| <a href="#">PSEN1-YAC (line G9)</a>                  | PSEN1: Transgenic                                | Elevated A $\beta$ 42 in the brain and plasma. Higher levels and earlier A $\beta$ deposition when crossed with APP YAC line R1.40.                                                                                                                                                                                                                               |
| <a href="#">PSEN2 Knock-out</a>                      | PSEN2: Knock-Out                                 | No gross brain abnormalities or astrogliosis.                                                                                                                                                                                                                                                                                                                     |
| <a href="#">PWK.APP/PS1</a>                          | APP: Transgenic; PSEN1: Transgenic               | Amyloid plaques and plaque-associated gliosis by 8 months.                                                                                                                                                                                                                                                                                                        |
| <a href="#">rTg9191</a>                              | APP: Transgenic                                  | Age-associated pathology in the cerebral cortex and hippocampus starting at 8 and 10½-12½ months of age, respectively. Gliosis and hyperphosphorylated tau in the vicinity of dense-core plaques. Fibrillar oligomeric species, e.g., A $\beta$ dimers.                                                                                                           |
| <a href="#">rTgTauEC</a>                             | MAPT: Transgenic                                 | Propagating tau pathology starting in the entorhinal cortex and spreading to regions functionally connected to the EC (e.g., dentate gyrus). Neurodegeneration and axonal degeneration, first in EC and parasubiculum. Gliosis and synaptic loss.                                                                                                                 |
| <a href="#">rTg(tauP301L)4510</a>                    | MAPT: Transgenic                                 | Argyrophilic tangle-like inclusions in cortex by 4 months and in hippocampus by 5.5 months. Decreased CA1 neurons (~60 percent) by 5.5 months. Gross forebrain atrophy by 10 months. The number of CA1 neurons stabilized after a brief (six to eight week) suppression of transgenic tau.                                                                        |
| <a href="#">Senescence Accelerated Mouse (SAMP8)</a> | Spontaneous                                      | Age-associated increase in hippocampal A $\beta$ from 4 to 12 months, but no plaque-like structures by Congo red or thioflavine S. Spongiform degeneration: vacuoles of various size in the neuropil in the brain stem. Microglial cell proliferation. Degeneration of dopamine neurons in the substantia nigra and noradrenaline neurons in the locus coeruleus. |
| <a href="#">Snx1*D465N/APOE4/Trem2*R47H</a>          | Snx1: Knock-In; APOE: Knock-In; Trem2: Knock-In  | Unknown.                                                                                                                                                                                                                                                                                                                                                          |
| <a href="#">Sorl1*A528T/APOE4/Trem2*R47H</a>         | Sorl1: Knock-In; APOE: Knock-In; Trem2: Knock-In | Unknown.                                                                                                                                                                                                                                                                                                                                                          |
| <a href="#">TAS10 (thy1-APP<sup>swe</sup>)</a>       | APP: Transgenic                                  | Age-related accumulation of A $\beta$ in the hippocampus and cortex leading to plaque deposition by 12 months of age. Early gliosis and dystrophic neurites, not limited to the vicinity around plaques. Changes in synaptic morphology and number, along with increased number of lysosomes.                                                                     |
| <a href="#">TASTPM (TAS10 x TPM)</a>                 | APP: Transgenic; PSEN1: Transgenic               | A $\beta$ deposits beginning at 3 months of age, with fibrillar plaques by 6 months in the cerebral cortex and hippocampus. Some vascular amyloid. Plaques surrounded by dystrophic neurites and reactive glia. No tangles or neuronal loss. Female mice have more rapid and severe amyloid pathology.                                                            |
| <a href="#">Tau264</a>                               | MAPT: Transgenic                                 | No overt neuropathology even at the advanced age of 24 months.                                                                                                                                                                                                                                                                                                    |
| <a href="#">Tau35</a>                                | MAPT: Transgenic                                 | Progressive tau pathology in the hippocampus, including abnormally phosphorylated and misfolded tau, mislocalized tau, and tangle-like structures. Dystrophic neurites.                                                                                                                                                                                           |
| <a href="#">Tau4RTg2652</a>                          | MAPT: Transgenic                                 | Extensive pretangle pathology throughout the brain (e.g. phospho- tau) but no mature neurofibrillary tangles and only mild oligomeric tau, restricted to the CA1 region of the hippocampus. Dystrophic neurites and axonal pathology (spheroids). No overt neuronal loss.                                                                                         |
| <a href="#">Tau609 (Tau 10 + 16)</a>                 | MAPT: Transgenic                                 | Aggregated tau in neurons of the entorhinal cortex, hippocampus, and cerebral cortex at advanced ages. Intraneuronal accumulation of tau oligomers in the hippocampus. Neuronal loss in the                                                                                                                                                                       |



|                                                        |                                                      |                                                                                                                                                                                                                                                                                                                                               |
|--------------------------------------------------------|------------------------------------------------------|-----------------------------------------------------------------------------------------------------------------------------------------------------------------------------------------------------------------------------------------------------------------------------------------------------------------------------------------------|
|                                                        |                                                      | entorhinal cortex and hippocampus. Gliosis. Some hippocampal areas affected by age-related synaptic dysfunction and reduced synaptic density.                                                                                                                                                                                                 |
| <a href="#">TauA152T-AAV</a>                           | MAPT: Virus                                          | Neuron loss and astrogliosis were observed in the cortices of 3-month-old mice.                                                                                                                                                                                                                                                               |
| <a href="#">TauC3 (Transgenic caspase-cleaved tau)</a> | MAPT: Transgenic                                     | No significant cell loss or astrogliosis in the brain. Age-dependent reduction in synaptic proteins (e.g. synaptophysin, PSD95) by 1.3 to 3 months of age. Hyperphosphorylated tau oligomers and aggregates.                                                                                                                                  |
| <a href="#">Tau Exon 10 Knock-out</a>                  | MAPT: Knock-Out                                      | No overt neuropathology at 12 months of age.                                                                                                                                                                                                                                                                                                  |
| <a href="#">TauΔK280 ("Proaggregation mutant")</a>     | MAPT: Transgenic                                     | Abundant pre-tangle pathology, but only rare mature tangles, and only at advanced ages. Tau pathology included mislocalization of tau to the somatodendritic compartment, aggregation, and hyperphosphorylation.                                                                                                                              |
| <a href="#">Tau P301L</a>                              | MAPT: Transgenic                                     | Pathologic hyperphosphorylation and conformational change of parenchymal tau in brain tissues starting at 7 months. Tangle-like pathology is mainly observed in the brain stem and spinal cord, and to a lesser extent in the midbrain and cerebral cortex. Age-dependent increase in total tau in CSF.                                       |
| <a href="#">TauP301L-AAV</a>                           | MAPT: Virus                                          | Neurofibrillary tangles and gliosis, but no cortical neuron loss, at 6 months of age.                                                                                                                                                                                                                                                         |
| <a href="#">Tau P301S (Line PS19)</a>                  | MAPT: Transgenic                                     | Neuron loss and brain atrophy by eight to 12 months, especially in the hippocampus and spreading to the neocortex and entorhinal cortex. Neurofibrillary tangles in the neocortex, amygdala, hippocampus, brain stem, and spinal cord. Neuroinflammation with microgliosis and astrogliosis.                                                  |
| <a href="#">TauPS2APP</a>                              | APP: Transgenic; MAPT: Transgenic; PSEN2: Transgenic | Phosphorylated tau accumulation in the subiculum and the CA1 region of the hippocampus at 4 months. Neurofibrillary tangles in these regions as well as the amygdala. Amyloid plaques. Dystrophic neurites and neuropil threads containing abnormally phosphorylated tau. No overt neuronal loss.                                             |
| <a href="#">Tau R406W transgenic</a>                   | MAPT: Transgenic                                     | Argyrophilic and congophilic tau inclusions in neurons of the forebrain with age. Detectable with Congo red, thioflavin-S and Gallyas silver stain. Congophilic tau inclusions also in the hippocampus and amygdala. Mainly straight tau filaments.                                                                                           |
| <a href="#">TauRDΔK280 ("Proaggregation mutant")</a>   | MAPT: Transgenic                                     | Tau aggregates and tangles as early as 2-3 months after gene expression. Gallyas silver-positive neurons abundant in the entorhinal cortex and amygdala, spreading to the neocortex by 15 months. "Ballooned" neurons. Astrogliosis. Synaptic structural changes and reduced synaptic number. Hippocampal neuronal loss.                      |
| <a href="#">Tau V337M</a>                              | MAPT: Transgenic                                     | SDS-insoluble tau aggregates in hippocampus. Degenerating neurons in the hippocampus containing phosphorylated and ubiquitinated tau aggregates with $\beta$ -sheet structure.                                                                                                                                                                |
| <a href="#">TBA42</a>                                  | APP: Transgenic                                      | Intraneuronal accumulation of A $\beta$ peptides in the hippocampus by 3 months and in cerebellar nuclei by 6 months. Marked gliosis in the hippocampus by 12 months. Very rare extracellular A $\beta$ deposits.                                                                                                                             |
| <a href="#">TetO-APPSweInd (line 102)</a>              | APP: Transgenic                                      | APP protein 10-30x higher than endogenous mouse APP. Progressive amyloid plaques starting at 2 months. Extensive amyloid pathology by 9 months especially in the cortex and hippocampus. Amyloid pathology is halted by transgene suppression but existing plaques are stable. Highest doxycycline sensitivity relative to lines 107 and 885. |
| <a href="#">TetO-APPSweInd (line 107)</a>              | APP: Transgenic                                      | APP protein 10-30x higher than endogenous mouse APP. Progressive amyloid plaques starting at 2 months. Extensive amyloid pathology by 9 months especially in the cortex and hippocampus.                                                                                                                                                      |

|                                                |                                          |                                                                                                                                                                                                                                                                                                                                                                                       |
|------------------------------------------------|------------------------------------------|---------------------------------------------------------------------------------------------------------------------------------------------------------------------------------------------------------------------------------------------------------------------------------------------------------------------------------------------------------------------------------------|
|                                                |                                          | Amyloid pathology is halted by transgene suppression but existing plaques are stable. Intermediate expression of transgene and doxycycline sensitivity relative to lines 102 and 885.                                                                                                                                                                                                 |
| <a href="#">TetO-APPSweInd (line 885)</a>      | APP: Transgenic                          | APP protein 10-30x higher than endogenous mouse APP. Progressive amyloid plaques starting at 2 months. Extensive amyloid pathology by 9 months especially in the cortex and hippocampus. Amyloid pathology is halted by transgene suppression but existing plaques are stable. Highest transgene expression and highest doxycycline requirement relative to lines 102 and 107.        |
| <a href="#">Tg2576</a>                         | APP: Transgenic                          | Numerous parenchymal A $\beta$ plaques by 11-13 months with some vascular amyloid. Oxidative lipid damage, astrogliosis and microgliosis. No tangles or neuronal loss.                                                                                                                                                                                                                |
| <a href="#">Tg2576/Tau(P301L) (APPSwe-Tau)</a> | APP; MAPT: Transgenic                    | Gradual appearance of plaques; by 9 months plaques are scattered throughout the cortex, hippocampus, and amygdala similar to Tg2576. Tau pathology more extensive than JNPL3. Astrocytosis and microgliosis.                                                                                                                                                                          |
| <a href="#">Tg4-42</a>                         | APP: Transgenic                          | A $\beta$ 4-42 is detectable starting at two months, predominantly in the CA1 region of the hippocampus, but also in the occipital cortex, piriform cortex, striatum, and superior colliculus. Age- and dose-dependent hippocampal neuronal loss is seen in the CA1 region as well as microgliosis and astrogliosis.                                                                  |
| <a href="#">TgAPPParc</a>                      | APP: Transgenic                          | Mild amyloid pathology with a relatively late onset, starting with intracellular A $\beta$ , then diffuse extracellular A $\beta$ deposits in the subiculum, expanding to interconnected brain regions such as retrosplenial granular cortex, thalamus, and mammillary bodies. Pathology more severe in females.                                                                      |
| <a href="#">tg-APPSwe</a>                      | APP: Transgenic                          | Extracellular amyloid deposition begins at ~12 months. Intraneuronal A $\beta$ aggregates at ~6 months. Extracellular pathology, both cerebrovascular amyloid angiopathy (CAA) and congophilic parenchymal plaques, mainly found in the cerebral cortex, hippocampus and thalamus. A $\beta$ -burden in cerebral cortex is approximately 1.0% (at 12 months) and 2.8% (at 18 months). |
| <a href="#">TgAPPSwe-KI</a>                    | APP: Knock-In                            | Accumulation of human A $\beta$ .                                                                                                                                                                                                                                                                                                                                                     |
| <a href="#">Tg-ArcSwe</a>                      | APP: Transgenic                          | Strong intraneuronal A $\beta$ aggregation starting at 1 month and increasing with age. Extracellular amyloid plaque at 5-6 months, most consistent in the cerebral cortex, hippocampus, and thalamus. Congophilic parenchymal plaques are predominant, but some mice show marked CAA, particularly in the thalamus.                                                                  |
| <a href="#">TgCRND8</a>                        | APP: Transgenic                          | Rapid, early plaque development, with thioflavin S-positive amyloid deposits at 3 months; dense cored plaques and neuritic pathology by 5 months. Plaques become more extensive with age. More A $\beta$ 42 than A $\beta$ 40. Activated microglia appear concurrently with plaques, whereas GFAP+ astrocytes follow later, about 13-14 weeks. Dystrophic neurites at 5 months.       |
| <a href="#">Tg-FDD</a>                         | ITM2B (BRI2): Transgenic                 | Widespread cerebral amyloid angiopathy (CAA) starting around 7 months. Deposition of the Danish amyloid subunit (ADan) in brain parenchyma and vessels, along with amyloid-associated gliosis and inflammation, intracellular and extracellular deposition of oligomeric ADan, and tau-positive deposits in neuropil, but no neurofibrillary tangles.                                 |
| <a href="#">Tg-mAPP/DN-RAGE</a>                | APP: Transgenic; RAGE (AGER): Transgenic | Diminished neuropathology compared with mice expressing mutant APP alone at both 3-4 and 14-18 months of age.                                                                                                                                                                                                                                                                         |
| <a href="#">Tg-mAPP/RAGE</a>                   | APP: Transgenic; RAGE (AGER): Transgenic | Increased activation of microglia and astrocytes compared to mice expressing mutant APP alone.                                                                                                                                                                                                                                                                                        |

|                                                           |                                                                         |                                                                                                                                                                                                                                                                                                                                                |
|-----------------------------------------------------------|-------------------------------------------------------------------------|------------------------------------------------------------------------------------------------------------------------------------------------------------------------------------------------------------------------------------------------------------------------------------------------------------------------------------------------|
| <a href="#">Tg-SwDI (APP-Swedish,Dutch,Iowa)</a>          | APP: Transgenic                                                         | Hemizygotes progressively accumulate insoluble A $\beta$ 40 and A $\beta$ 42, especially within brain microvessels starting at 3 months. Fibrillar A $\beta$ in microvessels around 6 months. Diffuse plaque-like deposits around 3 months in the subiculum, hippocampus and cortex. A $\beta$ deposits throughout the forebrain by 12 months. |
| <a href="#">THY-Tau22</a>                                 | MAPT: Transgenic                                                        | A variety of tau pathologies starting at 3 months, including neurofibrillary tangle-like inclusions, rare ghost tangles, and paired helical filament-like structures. Hyperphosphorylation of tau on many epitopes (e.g. AT8, AT100, AT180, AT270, 12E8, tau-pSer396, and AP422) and mild astrogliosis.                                        |
| <a href="#">TMHT (Thy-1 mutated human tau)</a>            | MAPT: Transgenic                                                        | Increased total tau, and phosphorylated tau (Thr181, Ser199, Thr231) in amygdala and hippocampus starting at 3 months.                                                                                                                                                                                                                         |
| <a href="#">TPM (Thy-1 PS1.M146V)</a>                     | PSEN1: Transgenic                                                       | No plaques.                                                                                                                                                                                                                                                                                                                                    |
| <a href="#">TREM2-BAC</a>                                 | TREM2: Transgenic                                                       | No obvious neuropathology is observed at 4, 7 and 11 months of age.                                                                                                                                                                                                                                                                            |
| <a href="#">TREM2-BAC X 5xFAD</a>                         | TREM2: Transgenic; APP: Transgenic; PSEN1: Transgenic                   | Amyloid plaques with plaque-associated microgliosis. Reduced plaque burden, altered microglial and plaque morphology, and less severe plaque-associated neuritic dystrophy, compared with 5xFAD.                                                                                                                                               |
| <a href="#">Trem2 flox</a>                                | Trem2: Knock-In                                                         | No data.                                                                                                                                                                                                                                                                                                                                       |
| <a href="#">TREM2, humanized (common variant) X 5XFAD</a> | Trem2: Knock-Out; TREM2: Transgenic; APP: Transgenic; PSEN1: Transgenic | Amyloid plaques surrounded by activated microglia.                                                                                                                                                                                                                                                                                             |
| <a href="#">TREM2, humanized (R47H) X 5XFAD</a>           | Trem2: Knock-Out; TREM2: Transgenic; APP: Transgenic; PSEN1: Transgenic | Lower density of activated microglia surrounding amyloid plaques in 5XFAD mice expressing the R47H variant of human TREM2 compared with those expressing the common variant.                                                                                                                                                                   |
| <a href="#">Trem2 KO (Colonna)</a>                        | Trem2: Knock-Out                                                        | Microglial number remains constant and microglial size decreases with age in the corpus callosum of Trem2 KO mice, while microglial number increases and microglial size remains stable in wild-type mice.                                                                                                                                     |
| <a href="#">Trem2 KO (Colonna) x 5XFAD</a>                | Trem2: Knock-Out; APP: Transgenic; PSEN1: Transgenic                    | Compared with 5XFAD, mice deficient in TREM2 show an age- dependent increase in amyloid accumulation in the hippocampus, more severe plaque-associated neuritic dystrophy, and exaggerated neuron loss in the cortex. Microglial containment of plaques is compromised in TREM2-deficient animals. Microglia accumulate autophagosomes.        |
| <a href="#">Trem2 KO (Colonna) x PS19</a>                 | Trem2: Knock-Out; MAPT: Transgenic                                      | Microgliosis, astrogliosis, and brain atrophy in Trem2 <sup>-/-</sup> PS19 mice are greatly attenuated compared with Trem2 <sup>+/-</sup> PS19 animals.                                                                                                                                                                                        |
| <a href="#">Trem2 KO (JAX)</a>                            | Trem2: Knock-Out                                                        | No data..                                                                                                                                                                                                                                                                                                                                      |
| <a href="#">Trem2 KO (KOMP)</a>                           | Trem2: Knock-Out                                                        | No data.                                                                                                                                                                                                                                                                                                                                       |
| <a href="#">Trem2 KO (KOMP) x APPPS1</a>                  | Trem2: Knock-Out; APP: Transgenic; PSEN1: Transgenic                    | Reduced plaque burden at early stages of plaque deposition but increased plaque burden at later stages, fewer plaque-associated myeloid cells and astrocytes, less phospho-tau in plaque-associated dystrophic neurites, compared with APPPS1.                                                                                                 |

|                                                           |                                                     |                                                                                                                                                                                                                                         |
|-----------------------------------------------------------|-----------------------------------------------------|-----------------------------------------------------------------------------------------------------------------------------------------------------------------------------------------------------------------------------------------|
| <a href="#">Trem2 KO (KOMP) x htau</a>                    | Mapt: Knock-Out; MAPT: Transgenic; Trem2: Knock-Out | Tau phosphorylation and aggregation in the cortex are enhanced in htau mice lacking TREM2, but reactive microglia are smaller and their processes have fewer branches.                                                                  |
| <a href="#">Trem2 R47H KI (Haass)</a>                     | Trem2: Knock-In                                     | Unknown.                                                                                                                                                                                                                                |
| <a href="#">Trem2 R47H KI (JAX)</a>                       | Trem2: Knock-In                                     | Unknown.                                                                                                                                                                                                                                |
| <a href="#">Trem2 R47H KI (Lamb/Landreth)</a>             | Trem2: Knock-In                                     | No 6E10- or Thioflavin S-positive amyloid plaques were observed at 4 months of age.                                                                                                                                                     |
| <a href="#">Trem2 R47H KI (Lamb/Landreth) X APPPS1-21</a> | Trem2: Knock-In; APP: Transgenic; PSEN1: Transgenic | Reduction in the number and burden of fibrillar amyloid plaques in the hippocampus, fewer plaque-associated myeloid cells, and worse plaque-associated neuritic dystrophy, compared with APPPS1-21 mice homozygous for wild-type Trem2. |
| <a href="#">Trem2 R47H KI x APOE4</a>                     | APOE: Knock-In; Trem2: Knock-In                     | No data.                                                                                                                                                                                                                                |
| <a href="#">Ts65Dn</a>                                    | Other                                               | Brain is grossly normal. Age-dependent cholinergic neurodegeneration and reduced NGF in the basal forebrain. Age-related elevation of APP and A $\beta$ in the hippocampus but no $\beta$ -amyloid pathology.                           |
| <a href="#">WSB.APP/PS1</a>                               | APP: Transgenic; PSEN1: Transgenic                  | Amyloid plaques, plaque-associated gliosis, cerebral amyloid angiopathy; possible neuron loss in cortex and hippocampal area CA1 in females.                                                                                            |
